# Supplementary material for: Recreational Use of the Countryside: No Evidence that High Nature Value Enhances a Key Ecosystem Service
Source: PubMed Central journal article supplement (PMC5102377; doi:10.1371/journal.pone.0165043), 2016-11-09

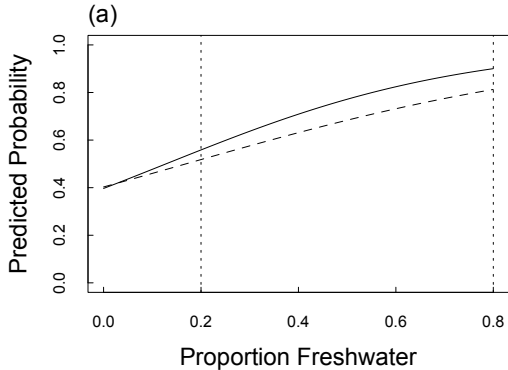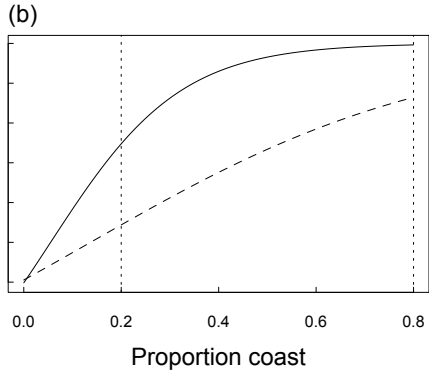

Supplement: pone.0165043.s003.pdf [file pone.0165043.s003.pdf]
